# Supplementary material
Source: PubMed Central journal article supplement (PMC7859883)
Supplement: NIHMS1665472-supplement-Appendix.pdf [file NIHMS1665472-supplement-Appendix.pdf]

**Appendix**  
**Differences in Public Support for Gun Policies Between Women and Men**  
**Crifasi et al.**

**Appendix Table 1.** Weighted and Unweighted Sociodemographic Characteristics of the Study Samples and National Rates in 2017

| <b>Characteristics</b>      | <b>Unweighted %</b> | <b>Weighted %</b> | <b>National comparison, %</b> |
|-----------------------------|---------------------|-------------------|-------------------------------|
| Female                      | 41.3                | 51.6              | 51.6                          |
| Age, years                  |                     |                   |                               |
| 18–29                       | 16.3                | 21.3              | 21.3                          |
| 30–44                       | 23.4                | 24.2              | 25.1                          |
| 45–59                       | 26.7                | 27.2              | 26.3                          |
| >60                         | 33.6                | 27.3              | 27.3                          |
| Race/ethnicity              |                     |                   |                               |
| White only                  | 70.1                | 64.4              | 64.4                          |
| Black only                  | 9.9                 | 11.8              | 11.9                          |
| Other <sup>a</sup>          | 6.7                 | 8.0               | 8.0                           |
| Hispanic                    | 13.3                | 15.8              | 15.7                          |
| Education                   |                     |                   |                               |
| <High school                | 8.9                 | 11.7              | 11.7                          |
| High school                 | 26.8                | 29.0              | 29.0                          |
| Some college                | 27.9                | 26.9              | 28.7                          |
| Bachelor's degree or higher | 36.4                | 32.4              | 30.7                          |
| Household income            |                     |                   |                               |
| <\$10,000                   | 5.5                 | 6.1               | 4.7                           |
| \$10,000–\$24,999           | 17.3                | 17.1              | 11.4                          |
| \$25,000–\$49,999           | 23.7                | 23.6              | 20.5                          |
| \$50,000–\$74,999           | 18.4                | 15.8              | 17.3                          |
| ≥\$75,000                   | 35.1                | 37.5              | 46.1                          |
| Employment status           |                     |                   |                               |
| Employed                    | 54.8                | 55.9              | 61.3                          |
| Unemployed                  | 6.4                 | 7.9               | 3.2                           |
| Other                       | 38.8                | 36.2              | 35.5                          |
| Region                      |                     |                   |                               |
| Northeast                   | 15.2                | 17.9              | 17.9                          |
| Midwest                     | 29.5                | 21.0              | 21.0                          |
| South                       | 32.6                | 37.5              | 37.5                          |
| West                        | 22.7                | 23.6              | 23.6                          |
| Political party affiliation |                     |                   |                               |
| Republican                  | 23.9                | 22.6              | 29.5                          |
| Independent                 | 39.5                | 39.7              | 33.8                          |
| Democrat                    | 36.6                | 37.7              | 36.7                          |

<sup>a</sup>Other race/ethnicity includes Alaskan Native, American Indian, Asian and Pacific Islanders.

**Appendix**  
**Differences in Public Support for Gun Policies Between Women and Men**  
**Crifasi et al.**

**Appendix Table 2.** Weighted and Unweighted Socio-Demographic Characteristics of the Study Samples and National Rates in 2019

| <b>Characteristics</b>      | <b>Unweighted %</b> | <b>Weighted %</b> | <b>National comparison, %</b> |
|-----------------------------|---------------------|-------------------|-------------------------------|
| Female                      | 48.0                | 51.6              | 48.4                          |
| Age, years                  |                     |                   |                               |
| 18–29                       | 15.1                | 21.1              | 21.1                          |
| 30–44                       | 28.5                | 24.5              | 25.0                          |
| 45–59                       | 53.5                | 25.9              | 25.3                          |
| >60                         | 32.9                | 28.6              | 28.6                          |
| Race/ethnicity              |                     |                   |                               |
| White only                  | 66.4                | 63.5              | 60.5                          |
| Black only                  | 10.2                | 11.9              | 12.3                          |
| Other <sup>a</sup>          | 8.0                 | 8.4               | 8.9                           |
| Hispanic                    | 15.2                | 16.2              | 18.3                          |
| Education                   |                     |                   |                               |
| <High school                | 3.9                 | 10.5              | 10.9                          |
| High school                 | 16.9                | 29.1              | 28.6                          |
| Some college                | 43.0                | 28.2              | 28.2                          |
| Bachelor's degree or higher | 36.2                | 32.3              | 32.3                          |
| Household income            |                     |                   |                               |
| <\$10,000                   | 4.4                 | 6.0               | 6.4                           |
| \$10,000–\$24,999           | 11.8                | 13.0              | 11.5                          |
| \$25,000–\$49,999           | 24.8                | 25.3              | 20.5                          |
| \$50,000–\$74,999           | 20.6                | 20.1              | 16.0                          |
| ≥\$75,000                   | 38.5                | 35.7              | 45.6                          |
| Employment status           |                     |                   |                               |
| Employed                    | 62.0                | 60.7              | 61.5                          |
| Unemployed                  | 4.8                 | 6.9               | 2.6                           |
| Other                       | 33.3                | 32.5              | 35.9                          |
| Region                      |                     |                   |                               |
| Northeast                   | 14.8                | 17.8              | 17.3                          |
| Midwest                     | 26.3                | 20.8              | 20.9                          |
| South                       | 34.9                | 37.7              | 37.9                          |
| West                        | 24.1                | 23.8              | 23.9                          |
| Political party affiliation |                     |                   |                               |
| Republican                  | 29.7                | 27.5              | 29.5                          |
| Independent                 | 38.7                | 41.0              | 33.8                          |
| Democrat                    | 31.6                | 31.5              | 36.7                          |

<sup>a</sup>Other race/ethnicity includes Alaskan Native, American Indian, Asian and Pacific Islanders.

**Appendix**  
**Differences in Public Support for Gun Policies Between Women and Men**  
**Crifasi et al.**

**Appendix Table 3.** Differences in Public Support for Gun Policies by Gender (N=3,804)

| Question – Do you favor or oppose...                                                                                                                                                       | Overall favor, % | Women (n=1,962) |             |           | Men (n=1,842) |            |           |
|--------------------------------------------------------------------------------------------------------------------------------------------------------------------------------------------|------------------|-----------------|-------------|-----------|---------------|------------|-----------|
|                                                                                                                                                                                            |                  | Favor, %        | Neutral, %  | Oppose, % | Favor, %      | Neutral, % | Oppose, % |
| <b>License and background check policies</b>                                                                                                                                               |                  |                 |             |           |               |            |           |
| Requiring a person to obtain a license from a local law enforcement agency before buying a gun to verify their identity and ensure that they are not legally prohibited from having a gun? | 77               | <b>82***</b>    | <b>9**</b>  | 9         | 71            | 10         | 19        |
| Requiring a background check system for all gun sales to make sure a purchaser is not legally prohibited from having a gun?                                                                | 88               | <b>90***</b>    | 5           | 5         | 85            | 7          | 8         |
| <b>Prohibited person policies</b>                                                                                                                                                          |                  |                 |             |           |               |            |           |
| Prohibiting a person convicted of a serious crime as a juvenile from having a gun for 10 years?                                                                                            | 75               | <b>78***</b>    | <b>12*</b>  | 10        | 72            | 12         | 16        |
| Prohibiting a person under the age of 21 from having a handgun?                                                                                                                            | 64               | <b>70***</b>    | <b>12*</b>  | 18        | 58            | 13         | 29        |
| Prohibiting a person subject to a temporary domestic violence restraining order from having a gun for the duration of the order?                                                           | 81               | <b>85***</b>    | 8           | 7         | 77            | 10         | 13        |
| Prohibiting a person convicted of two or more DWI or DUIs in a five-year period from having a gun for five years?                                                                          | 56               | <b>61***</b>    | 19          | 20        | 51            | 20         | 29        |
| Prohibiting a person convicted of two or more misdemeanor crimes involving illegal drugs in a five-year period from having a gun for five years?                                           | 66               | <b>69***</b>    | <b>16**</b> | 15        | 63            | 15         | 22        |
| Do you favor or oppose prohibiting a person convicted of each of these crimes from having a gun for 10 years?                                                                              |                  |                 |             |           |               |            |           |

**Appendix**  
**Differences in Public Support for Gun Policies Between Women and Men**  
**Crifasi et al.**

|                                                                                                                                                                                                              |    |              |              |    |    |    |    |
|--------------------------------------------------------------------------------------------------------------------------------------------------------------------------------------------------------------|----|--------------|--------------|----|----|----|----|
| Public display of a gun in a threatening manner, excluding self-defense                                                                                                                                      | 73 | 75           | 7            | 18 | 72 | 9  | 19 |
| Assault and battery that does not result in serious injury or involve a lethal weapon                                                                                                                        | 55 | <b>58***</b> | 16           | 26 | 51 | 17 | 32 |
| Drunk and disorderly conduct                                                                                                                                                                                 | 46 | <b>50***</b> | <b>20**</b>  | 30 | 42 | 18 | 40 |
| Carrying a concealed gun without a permit                                                                                                                                                                    | 55 | 57           | 13           | 30 | 52 | 15 | 33 |
| <b>Assault weapon and ammunition policies</b>                                                                                                                                                                |    |              |              |    |    |    |    |
| Banning the sale of military-style, semi-automatic assault weapons that are capable of shooting more than 10 rounds of ammunition without reloading?                                                         | 63 | <b>71***</b> | <b>11***</b> | 18 | 54 | 9  | 37 |
| Banning the sale of large-capacity ammunition clips or magazines that allow some guns to shoot more than 10 bullets before reloading?                                                                        | 61 | <b>69***</b> | <b>14***</b> | 17 | 52 | 14 | 34 |
| <b>Policies affecting gun dealers</b>                                                                                                                                                                        |    |              |              |    |    |    |    |
| Allowing cities to sue licensed gun dealers when there is strong evidence that the gun dealer's careless sales practices allowed many criminals to obtain guns?                                              | 74 | <b>78**</b>  | 11           | 11 | 71 | 14 | 15 |
| Allowing the Bureau of Alcohol, Tobacco and Firearms to temporarily take away a gun dealer's license if an audit reveals record-keeping violations and the dealer cannot account for 20 or more of his guns? | 84 | 86           | 8            | 6  | 82 | 10 | 8  |
| Allowing the information about which gun dealers sell the most guns used in crimes to be available to the police and the public so that those gun dealers can be prioritized for greater oversight?          | 72 | <b>75***</b> | <b>15**</b>  | 10 | 68 | 15 | 17 |
| <b>Temporary firearm removal policies</b>                                                                                                                                                                    |    |              |              |    |    |    |    |
| Authorizing law enforcement officers to temporarily remove guns from individuals who                                                                                                                         | 75 | <b>81***</b> | 9            | 10 | 69 | 13 | 28 |

**Appendix**  
**Differences in Public Support for Gun Policies Between Women and Men**  
**Crifasi et al.**

|                                                                                                                                                           |    |              |    |    |    |    |    |  |
|-----------------------------------------------------------------------------------------------------------------------------------------------------------|----|--------------|----|----|----|----|----|--|
| the officer determines pose an immediate threat of harm to self or others?                                                                                |    |              |    |    |    |    |    |  |
| Allowing family members to ask the court to temporarily remove guns from a relative who they believe is at risk of harming himself or others?             | 79 | <b>84***</b> | 7  | 9  | 72 | 10 | 18 |  |
| <b>Other policies</b>                                                                                                                                     |    |              |    |    |    |    |    |  |
| Requiring a mandatory minimum sentence of two years in prison for a person convicted of knowingly selling a gun to someone who cannot legally have a gun? | 76 | <b>79**</b>  | 11 | 10 | 73 | 13 | 14 |  |
| Requiring by law that a person lock up the guns in their home when not in use to prevent handling by children or teenagers without adult supervision?     | 74 | <b>80***</b> | 9  | 11 | 67 | 13 | 20 |  |
| Allowing a person who can legally carry a concealed gun to bring that gun onto school grounds for kindergarten through 12th grade?                        | 28 | <b>24***</b> | 12 | 64 | 31 | 13 | 56 |  |

*Notes:* Boldface indicates statistical significance in differences in support between women and men (\* $p < 0.05$ , \*\* $p < 0.01$ , \*\*\* $p < 0.001$ ). Ref category is opposed to the policy.

DWI, driving while intoxicated; DUI, driving under the influence.

**Appendix**  
**Differences in Public Support for Gun Policies Between Women and Men**  
**Crifasi et al.**

**Appendix Table 4.** Differences in Support for Public Policies by Among Gun Owners by Gender (N=976)

| Question – Do you favor or oppose...                                                                                                                                                       | Female gun owners (n=298) |            |           | Male gun owners (n=678) |            |           |
|--------------------------------------------------------------------------------------------------------------------------------------------------------------------------------------------|---------------------------|------------|-----------|-------------------------|------------|-----------|
|                                                                                                                                                                                            | Favor, %                  | Neutral, % | Oppose, % | Favor, %                | Neutral, % | Oppose, % |
| <b>License and background check policies</b>                                                                                                                                               |                           |            |           |                         |            |           |
| Requiring a person to obtain a license from a local law enforcement agency before buying a gun to verify their identity and ensure that they are not legally prohibited from having a gun? | 69                        | 9          | 22        | 60                      | 12         | 28        |
| Requiring a background check system for all gun sales to make sure a purchaser is not legally prohibited from having a gun?                                                                | 87                        | 3          | 10        | 85                      | 5          | 10        |
| <b>Prohibited person policies</b>                                                                                                                                                          |                           |            |           |                         |            |           |
| Prohibiting a person convicted of a serious crime as a juvenile from having a gun for 10 years?                                                                                            | <b>80*</b>                | 9          | 11        | 70                      | 13         | 17        |
| Prohibiting a person under the age of 21 from having a handgun?                                                                                                                            | 55                        | 13         | 32        | 51                      | 12         | 37        |
| Prohibiting a person subject to a temporary domestic violence restraining order from having a gun for the duration of the order?                                                           | 80                        | 11         | 9         | 74                      | 11         | 15        |
| Prohibiting a person convicted of two or more DWI or DUIs in a five-year period from having a gun for five years?                                                                          | <b>62**</b>               | 12         | 26        | 45                      | 21         | 34        |
| Prohibiting a person convicted of two or more misdemeanor crimes involving illegal drugs in a five-year period from having a gun for five years?                                           | 69                        | 11         | 20        | 60                      | 14         | 26        |
| Do you favor or oppose prohibiting a person convicted of each of these crimes from having a gun for 10 years?                                                                              |                           |            |           |                         |            |           |
| Public display of a gun in a threatening manner, excluding self-defense                                                                                                                    | 75                        | <b>4*</b>  | 21        | 71                      | 10         | 19        |

**Appendix**  
**Differences in Public Support for Gun Policies Between Women and Men**  
**Crifasi et al.**

|                                                                                                                                                                                                              |              |            |    |    |    |    |
|--------------------------------------------------------------------------------------------------------------------------------------------------------------------------------------------------------------|--------------|------------|----|----|----|----|
| Assault and battery that does not result in serious injury or involve a lethal weapon                                                                                                                        | 49           | 17         | 34 | 42 | 21 | 37 |
| Drunk and disorderly conduct                                                                                                                                                                                 | <b>49***</b> | 18         | 33 | 34 | 18 | 48 |
| Carrying a concealed gun without a permit                                                                                                                                                                    | 44           | 12         | 44 | 46 | 15 | 39 |
| <b>Assault weapon and ammunition policies</b>                                                                                                                                                                |              |            |    |    |    |    |
| Banning the sale of military-style, semi-automatic assault weapons that are capable of shooting more than 10 rounds of ammunition without reloading?                                                         | <b>49*</b>   | <b>11*</b> | 40 | 40 | 7  | 53 |
| Banning the sale of large-capacity ammunition clips or magazines that allow some guns to shoot more than 10 bullets before reloading?                                                                        | <b>45*</b>   | <b>17*</b> | 38 | 37 | 13 | 50 |
| <b>Policies affecting gun dealers</b>                                                                                                                                                                        |              |            |    |    |    |    |
| Allowing cities to sue licensed gun dealers when there is strong evidence that the gun dealer's careless sales practices allowed many criminals to obtain guns?                                              | 70           | 12         | 18 | 64 | 15 | 21 |
| Allowing the Bureau of Alcohol, Tobacco and Firearms to temporarily take away a gun dealer's license if an audit reveals record-keeping violations and the dealer cannot account for 20 or more of his guns? | 84           | 7          | 9  | 80 | 11 | 9  |
| Allowing the information about which gun dealers sell the most guns used in crimes to be available to the police and the public so that those gun dealers can be prioritized for greater oversight?          | 67           | 16         | 17 | 59 | 17 | 24 |
| <b>Temporary firearm removal policies</b>                                                                                                                                                                    |              |            |    |    |    |    |
| Authorizing law enforcement officers to temporarily remove guns from individuals who the officer determines pose an immediate threat of harm to self or others?                                              | 71           | 13         | 16 | 65 | 11 | 24 |

**Appendix**  
**Differences in Public Support for Gun Policies Between Women and Men**  
**Crifasi et al.**

|                                                                                                                                                           |    |    |    |    |    |    |
|-----------------------------------------------------------------------------------------------------------------------------------------------------------|----|----|----|----|----|----|
| Allowing family members to ask the court to temporarily remove guns from a relative who they believe is at risk of harming himself or others?             | 74 | 10 | 16 | 67 | 10 | 23 |
| <b>Other policies</b>                                                                                                                                     |    |    |    |    |    |    |
| Requiring a mandatory minimum sentence of two years in prison for a person convicted of knowingly selling a gun to someone who cannot legally have a gun? | 73 | 12 | 15 | 71 | 12 | 17 |
| Requiring by law that a person lock up the guns in their home when not in use to prevent handling by children or teenagers without adult supervision?     | 63 | 13 | 24 | 57 | 12 | 31 |
| Allowing a person who can legally carry a concealed gun to bring that gun onto school grounds for kindergarten through 12th grade?                        | 41 | 10 | 49 | 46 | 13 | 41 |

*Notes:* Boldface indicates statistical significance in differences in support between women and men (\* $p < 0.05$ , \*\* $p < 0.01$ , \*\*\* $p < 0.001$ ). Ref category is opposed to the policy.

DWI, driving while intoxicated; DUI, driving under the influence.

**Appendix**  
**Differences in Public Support for Gun Policies Between Women and Men**  
**Crifasi et al.**

**Appendix Table 5.** Differences in Support for Public Policies by Among Non-Gun Owners by Gender (N=3,804)

| Question – Do you favor or oppose...                                                                                                                                                       | Female non-owners (n=1,664) |               |              | Male non-owners (n=1,164) |               |              |
|--------------------------------------------------------------------------------------------------------------------------------------------------------------------------------------------|-----------------------------|---------------|--------------|---------------------------|---------------|--------------|
|                                                                                                                                                                                            | Favor,<br>%                 | Neutral,<br>% | Oppose,<br>% | Favor,<br>%               | Neutral,<br>% | Oppose,<br>% |
| <b>License and background check policies</b>                                                                                                                                               |                             |               |              |                           |               |              |
| Requiring a person to obtain a license from a local law enforcement agency before buying a gun to verify their identity and ensure that they are not legally prohibited from having a gun? | <b>85***</b>                | <b>9**</b>    | 6            | 77                        | 9             | 14           |
| Requiring a background check system for all gun sales to make sure a purchaser is not legally prohibited from having a gun?                                                                | <b>91**</b>                 | 5             | 4            | 85                        | 8             | 7            |
| <b>Prohibited person policies</b>                                                                                                                                                          |                             |               |              |                           |               |              |
| Prohibiting a person convicted of a serious crime as a juvenile from having a gun for 10 years?                                                                                            | <b>78**</b>                 | <b>12*</b>    | 10           | 73                        | 12            | 15           |
| Prohibiting a person under the age of 21 from having a handgun?                                                                                                                            | <b>73***</b>                | 12            | 15           | 62                        | 14            | 24           |
| Prohibiting a person subject to a temporary domestic violence restraining order from having a gun for the duration of the order?                                                           | <b>86**</b>                 | 8             | 6            | 79                        | 10            | 11           |
| Prohibiting a person convicted of two or more DWI or DUIs in a five-year period from having a gun for five years?                                                                          | <b>61**</b>                 | 20            | 19           | 55                        | 20            | 25           |
| Prohibiting a person convicted of two or more misdemeanor crimes involving illegal drugs in a five-year period from having a gun for five years?                                           | <b>69**</b>                 | <b>17**</b>   | 14           | 64                        | 15            | 21           |
| Do you favor or oppose prohibiting a person convicted of each of these crimes from having a gun for 10 years?                                                                              |                             |               |              |                           |               |              |
| Public display of a gun in a threatening manner, excluding self-defense                                                                                                                    | 75                          | 8             | 17           | 72                        | 9             | 19           |
| Assault and battery that does not result in serious injury or involve a lethal weapon                                                                                                      | <b>60*</b>                  | 16            | 24           | 56                        | 16            | 30           |
| Drunk and disorderly conduct                                                                                                                                                               | <b>50*</b>                  | <b>21*</b>    | 29           | 46                        | 18            | 36           |

**Appendix**  
**Differences in Public Support for Gun Policies Between Women and Men**  
**Crifasi et al.**

|                                                                                                                                                                                                              |              |             |    |    |    |    |
|--------------------------------------------------------------------------------------------------------------------------------------------------------------------------------------------------------------|--------------|-------------|----|----|----|----|
| Carrying a concealed gun without a permit                                                                                                                                                                    | 60           | 12          | 28 | 56 | 15 | 29 |
| <b>Assault weapon and ammunition policies</b>                                                                                                                                                                |              |             |    |    |    |    |
| Banning the sale of military-style, semi-automatic assault weapons that are capable of shooting more than 10 rounds of ammunition without reloading?                                                         | <b>75***</b> | <b>11**</b> | 14 | 62 | 11 | 27 |
| Banning the sale of large-capacity ammunition clips or magazines that allow some guns to shoot more than 10 bullets before reloading?                                                                        | <b>73***</b> | <b>13**</b> | 14 | 61 | 14 | 25 |
| <b>Policies affecting gun dealers</b>                                                                                                                                                                        |              |             |    |    |    |    |
| Allowing cities to sue licensed gun dealers when there is strong evidence that the gun dealer's careless sales practices allowed many criminals to obtain guns?                                              | 79           | 11          | 10 | 74 | 14 | 12 |
| Allowing the Bureau of Alcohol, Tobacco and Firearms to temporarily take away a gun dealer's license if an audit reveals record-keeping violations and the dealer cannot account for 20 or more of his guns? | 86           | 9           | 5  | 83 | 9  | 8  |
| Allowing the information about which gun dealers sell the most guns used in crimes to be available to the police and the public so that those gun dealers can be prioritized for greater oversight?          | <b>77*</b>   | 14          | 9  | 73 | 14 | 13 |
| <b>Temporary firearm removal policies</b>                                                                                                                                                                    |              |             |    |    |    |    |
| Authorizing law enforcement officers to temporarily remove guns from individuals who the officer determines pose an immediate threat of harm to self or others?                                              | <b>83***</b> | 8           | 9  | 72 | 13 | 15 |
| Allowing family members to ask the court to temporarily remove guns from a relative who they believe is at risk of harming himself or others?                                                                | <b>85***</b> | 7           | 8  | 75 | 10 | 15 |
| <b>Other policies</b>                                                                                                                                                                                        |              |             |    |    |    |    |
| Requiring a mandatory minimum sentence of two years in prison for a person convicted of knowingly                                                                                                            | <b>80*</b>   | 11          | 9  | 74 | 13 | 13 |

**Appendix**  
**Differences in Public Support for Gun Policies Between Women and Men**  
**Crifasi et al.**

|                                                                                                                                                       |             |    |    |    |    |    |
|-------------------------------------------------------------------------------------------------------------------------------------------------------|-------------|----|----|----|----|----|
| selling a gun to someone who cannot legally have a gun?                                                                                               |             |    |    |    |    |    |
| Requiring by law that a person lock up the guns in their home when not in use to prevent handling by children or teenagers without adult supervision? | <b>82**</b> | 9  | 9  | 73 | 13 | 13 |
| Allowing a person who can legally carry a concealed gun to bring that gun onto school grounds for kindergarten through 12th grade?                    | 21          | 12 | 67 | 23 | 13 | 64 |

*Notes:* Boldface indicates statistical significance in differences in support between women and men ( $*p<0.05$ ,  $**p<0.01$ ,  $***p<0.001$ ). Ref category is opposed to the policy.

DWI, driving while intoxicated; DUI, driving under the influence.

**Appendix**  
**Differences in Public Support for Gun Policies Between Women and Men**  
**Crifasi et al.**

**Appendix Table 6.** Standardized Mean Differences in Public Support for Gun Policies by Gender (N=3,804)

| Question – Do you favor or oppose...                                                                                                                                                       | Women (n=1,962),<br>mean | Men (n=1,842), mean | SMD   |
|--------------------------------------------------------------------------------------------------------------------------------------------------------------------------------------------|--------------------------|---------------------|-------|
| <b>License and background check policies</b>                                                                                                                                               |                          |                     |       |
| Requiring a person to obtain a license from a local law enforcement agency before buying a gun to verify their identity and ensure that they are not legally prohibited from having a gun? | 0.822                    | 0.711               | 0.263 |
| Requiring a background check system for all gun sales to make sure a purchaser is not legally prohibited from having a gun?                                                                | 0.902                    | 0.850               | 0.160 |
| <b>Prohibited person policies</b>                                                                                                                                                          |                          |                     |       |
| Prohibiting a person convicted of a serious crime as a juvenile from having a gun for 10 years?                                                                                            | 0.785                    | 0.718               | 0.153 |
| Prohibiting a person under the age of 21 from having a handgun?                                                                                                                            | 0.703                    | 0.579               | 0.260 |
| Prohibiting a person subject to a temporary domestic violence restraining order from having a gun for the duration of the order?                                                           | 0.847                    | 0.768               | 0.201 |
| Prohibiting a person convicted of two or more DWI or DUIs in a five-year period from having a gun for five years?                                                                          | 0.610                    | 0.512               | 0.196 |
| Prohibiting a person convicted of two or more misdemeanor crimes involving illegal drugs in a five-year period from having a gun for five years?                                           | 0.688                    | 0.630               | 0.123 |
| <b>Do you favor or oppose prohibiting a person convicted of each of these crimes from having a gun for 10 years?</b>                                                                       |                          |                     |       |
| Public display of a gun in a threatening manner, excluding self-defense                                                                                                                    | 0.753                    | 0.715               | 0.085 |
| Assault and battery that does not result in serious injury or involve a lethal weapon                                                                                                      | 0.582                    | 0.509               | 0.147 |
| Drunk and disorderly conduct                                                                                                                                                               | 0.502                    | 0.419               | 0.168 |

**Appendix**  
**Differences in Public Support for Gun Policies Between Women and Men**  
**Crifasi et al.**

|                                                                                                                                                                                                              |       |       |       |
|--------------------------------------------------------------------------------------------------------------------------------------------------------------------------------------------------------------|-------|-------|-------|
| Carrying a concealed gun without a permit                                                                                                                                                                    | 0.573 | 0.523 | 0.099 |
| <b>Assault weapon and ammunition policies</b>                                                                                                                                                                |       |       |       |
| Banning the sale of military-style, semi-automatic assault weapons that are capable of shooting more than 10 rounds of ammunition without reloading?                                                         | 0.709 | 0.542 | 0.345 |
| Banning the sale of large-capacity ammunition clips or magazines that allow some guns to shoot more than 10 bullets before reloading?                                                                        | 0.690 | 0.520 | 0.347 |
| <b>Policies affecting gun dealers</b>                                                                                                                                                                        |       |       |       |
| Allowing cities to sue licensed gun dealers when there is strong evidence that the gun dealer's careless sales practices allowed many criminals to obtain guns?                                              | 0.777 | 0.707 | 0.160 |
| Allowing the Bureau of Alcohol, Tobacco and Firearms to temporarily take away a gun dealer's license if an audit reveals record-keeping violations and the dealer cannot account for 20 or more of his guns? | 0.857 | 0.820 | 0.099 |
| Allowing the information about which gun dealers sell the most guns used in crimes to be available to the police and the public so that those gun dealers can be prioritized for greater oversight?          | 0.690 | 0.520 | 0.168 |
| <b>Temporary firearm removal policies</b>                                                                                                                                                                    |       |       |       |
| Authorizing law enforcement officers to temporarily remove guns from individuals who the officer determines pose an immediate threat of harm to self or others?                                              | 0.809 | 0.693 | 0.271 |
| Allowing family members to ask the court to temporarily remove guns from a relative who they believe is at risk of harming himself or others?                                                                | 0.833 | 0.674 | 0.210 |
| <b>Other policies</b>                                                                                                                                                                                        |       |       |       |
| Requiring a mandatory minimum sentence of two years in prison for a person convicted of                                                                                                                      | 0.787 | 0.728 | 0.139 |

**Appendix**  
**Differences in Public Support for Gun Policies Between Women and Men**  
**Crifasi et al.**

---

|                                                                                                                                                       |       |       |        |
|-------------------------------------------------------------------------------------------------------------------------------------------------------|-------|-------|--------|
| knowingly selling a gun to someone who cannot legally have a gun?                                                                                     |       |       |        |
| Requiring by law that a person lock up the guns in their home when not in use to prevent handling by children or teenagers without adult supervision? | 0.857 | 0.674 | 0.415  |
| Allowing a person who can legally carry a concealed gun to bring that gun onto school grounds for kindergarten through 12th grade?                    | 0.241 | 0.312 | -0.159 |

---

SMD, standardized mean difference; DWI, driving while intoxicated; DUI, driving under the influence.

**Appendix**  
**Differences in Public Support for Gun Policies Between Women and Men**  
**Crifasi et al.**

**Appendix Table 7.** Standardized Mean Differences in Support for Public Policies by Gun Ownership and Gender (N=3,804)

| Question – Do you favor or oppose...                                                                                                                                                       | Female<br>gun<br>owners<br>(n=298),<br>mean | Male<br>gun<br>owners<br>(n=678),<br>mean | SMD   | Female non-<br>owners<br>(n=1,664),<br>mean | Male non-<br>owners<br>(N=1,164),<br>mean | SMD   |
|--------------------------------------------------------------------------------------------------------------------------------------------------------------------------------------------|---------------------------------------------|-------------------------------------------|-------|---------------------------------------------|-------------------------------------------|-------|
| <b>License and background check policies</b>                                                                                                                                               |                                             |                                           |       |                                             |                                           |       |
| Requiring a person to obtain a license from a local law enforcement agency before buying a gun to verify their identity and ensure that they are not legally prohibited from having a gun? | 0.693                                       | 0.603                                     | 0.167 | 0.845                                       | 0.774                                     | 0.191 |
| Requiring a background check system for all gun sales to make sure a purchaser is not legally prohibited from having a gun?                                                                | 0.865                                       | 0.845                                     | 0.051 | 0.909                                       | 0.853                                     | 0.185 |
| <b>Prohibited person policies</b>                                                                                                                                                          |                                             |                                           |       |                                             |                                           |       |
| Prohibiting a person convicted of a serious crime as a juvenile from having a gun for 10 years?                                                                                            | 0.795                                       | 0.701                                     | 0.191 | 0.783                                       | 0.729                                     | 0.132 |
| Prohibiting a person under the age of 21 from having a handgun?                                                                                                                            | 0.554                                       | 0.509                                     | 0.082 | 0.730                                       | 0.620                                     | 0.248 |
| Prohibiting a person subject to a temporary domestic violence restraining order from having a gun for the duration of the order?                                                           | 0.803                                       | 0.736                                     | 0.140 | 0.855                                       | 0.787                                     | 0.188 |
| Prohibiting a person convicted of two or more DWI or DUIs in a five-year period from having a gun for five years?                                                                          | 0.621                                       | 0.447                                     | 0.312 | 0.608                                       | 0.550                                     | 0.121 |
| Prohibiting a person convicted of two or more misdemeanor crimes involving illegal drugs in a five-year period from having a gun for five years?                                           | 0.686                                       | 0.604                                     | 0.152 | 0.688                                       | 0.645                                     | 0.097 |
| Do you favor or oppose prohibiting a person convicted of each of these crimes from having a gun for 10 years?                                                                              |                                             |                                           |       |                                             |                                           |       |

**Appendix**  
**Differences in Public Support for Gun Policies Between Women and Men**  
**Crifasi et al.**

|                                                                                                                                                                                                              |       |       |        |       |       |       |
|--------------------------------------------------------------------------------------------------------------------------------------------------------------------------------------------------------------|-------|-------|--------|-------|-------|-------|
| Public display of a gun in a threatening manner, excluding self-defense                                                                                                                                      | 0.748 | 0.710 | 0.076  | 0.754 | 0.718 | 0.085 |
| Assault and battery that does not result in serious injury or involve a lethal weapon                                                                                                                        | 0.490 | 0.423 | 0.121  | 0.599 | 0.599 | 0.085 |
| Drunk and disorderly conduct                                                                                                                                                                                 | 0.490 | 0.339 | 0.278  | 0.505 | 0.465 | 0.084 |
| Carrying a concealed gun without a permit                                                                                                                                                                    | 0.443 | 0.456 | -0.024 | 0.596 | 0.563 | 0.070 |
| <b>Assault weapon and ammunition policies</b>                                                                                                                                                                |       |       |        |       |       |       |
| Banning the sale of military-style, semi-automatic assault weapons that are capable of shooting more than 10 rounds of ammunition without reloading?                                                         | 0.489 | 0.401 | 0.159  | 0.748 | 0.624 | 0.282 |
| Banning the sale of large-capacity ammunition clips or magazines that allow some guns to shoot more than 10 bullets before reloading?                                                                        | 0.453 | 0.372 | 0.148  | 0.732 | 0.606 | 0.282 |
| <b>Policies affecting gun dealers</b>                                                                                                                                                                        |       |       |        |       |       |       |
| Allowing cities to sue licensed gun dealers when there is strong evidence that the gun dealer's careless sales practices allowed many criminals to obtain guns?                                              | 0.704 | 0.643 | 0.117  | 0.790 | 0.744 | 0.114 |
| Allowing the Bureau of Alcohol, Tobacco and Firearms to temporarily take away a gun dealer's license if an audit reveals record-keeping violations and the dealer cannot account for 20 or more of his guns? | 0.839 | 0.801 | 0.089  | 0.860 | 0.831 | 0.083 |
| Allowing the information about which gun dealers sell the most guns used in crimes to be available to the police and the public so that those gun dealers can be prioritized for greater oversight?          | 0.672 | 0.588 | 0.153  | 0.770 | 0.732 | 0.092 |
| <b>Temporary firearm removal policies</b>                                                                                                                                                                    |       |       |        |       |       |       |
| Authorizing law enforcement officers to temporarily remove guns from individuals who                                                                                                                         | 0.713 | 0.652 | 0.118  | 0.827 | 0.717 | 0.278 |

**Appendix**  
**Differences in Public Support for Gun Policies Between Women and Men**  
**Crifasi et al.**

|                                                                                                                                                           |       |       |        |       |       |        |
|-----------------------------------------------------------------------------------------------------------------------------------------------------------|-------|-------|--------|-------|-------|--------|
| the officer determines pose an immediate threat of harm to self or others?                                                                                |       |       |        |       |       |        |
| Allowing family members to ask the court to temporarily remove guns from a relative who they believe is at risk of harming himself or others?             | 0.754 | 0.724 | 0.061  | 0.847 | 0.761 | 0.230  |
| <b>Other policies</b>                                                                                                                                     |       |       |        |       |       |        |
| Requiring a mandatory minimum sentence of two years in prison for a person convicted of knowingly selling a gun to someone who cannot legally have a gun? | 0.733 | 0.712 | 0.042  | 0.797 | 0.737 | 0.151  |
| Requiring by law that a person lock up the guns in their home when not in use to prevent handling by children or teenagers without adult supervision?     | 0.634 | 0.569 | 0.118  | 0.824 | 0.734 | 0.229  |
| Allowing a person who can legally carry a concealed gun to bring that gun onto school grounds for kindergarten through 12th grade?                        | 0.411 | 0.463 | -0.094 | 0.211 | 0.225 | -0.036 |

SMD, standardized mean difference; DWI, driving while intoxicated; DUI, driving under the influence.
